# Supplementary material for: Comparative Analysis of Phytochemical Composition of Gamma-Irradiated Mutant Cultivars of Chrysanthemum morifolium
Source: PubMed Central journal article supplement (PMC6720760; doi:10.3390/molecules24163003), 2019-08-19
Supplement: molecules-24-03003-s001.pdf [file molecules-24-03003-s001.pdf]

*Supplementary Materials*

# **Comparative Analysis of Phytochemical Composition of Gamma-Irradiated Mutant Cultivars of *Chrysanthemum morifolium***

**Jaihyunk Ryu, Bomi Nam, Bo Ram Kim, Sang Hoon Kim, Yeong Deuk Jo, Joon-Woo Ahn, Jin-Baek Kim, Chang Hyun Jin and Ah-Reum Han \***

Advanced Radiation Technology Institute, Korea Atomic Energy Research Institute, Jeongeup-si, Jeollabuk-do 56212, Republic of Korea; jhryu@kaeri.re.kr (J.R.); bomi1201@kaeri.re.kr (B.N.); boram1606@kaeri.re.kr (B.R.K); shkim80@kaeri.re.kr (S.H.K.); jyd@kaeri.re.kr (Y.D.J.); joon@kaeri.re.kr (J.-W.A); jbkim74@kaeri.re.kr (J.-B.K.); chjin@kaeri.re.kr (C.H.J.); arhan@kaeri.re.kr (A.-R.H.)

\* Correspondence: arhan@kaeri.re.kr; Tel.: +82-63-570-3167 (A.-R.H.)

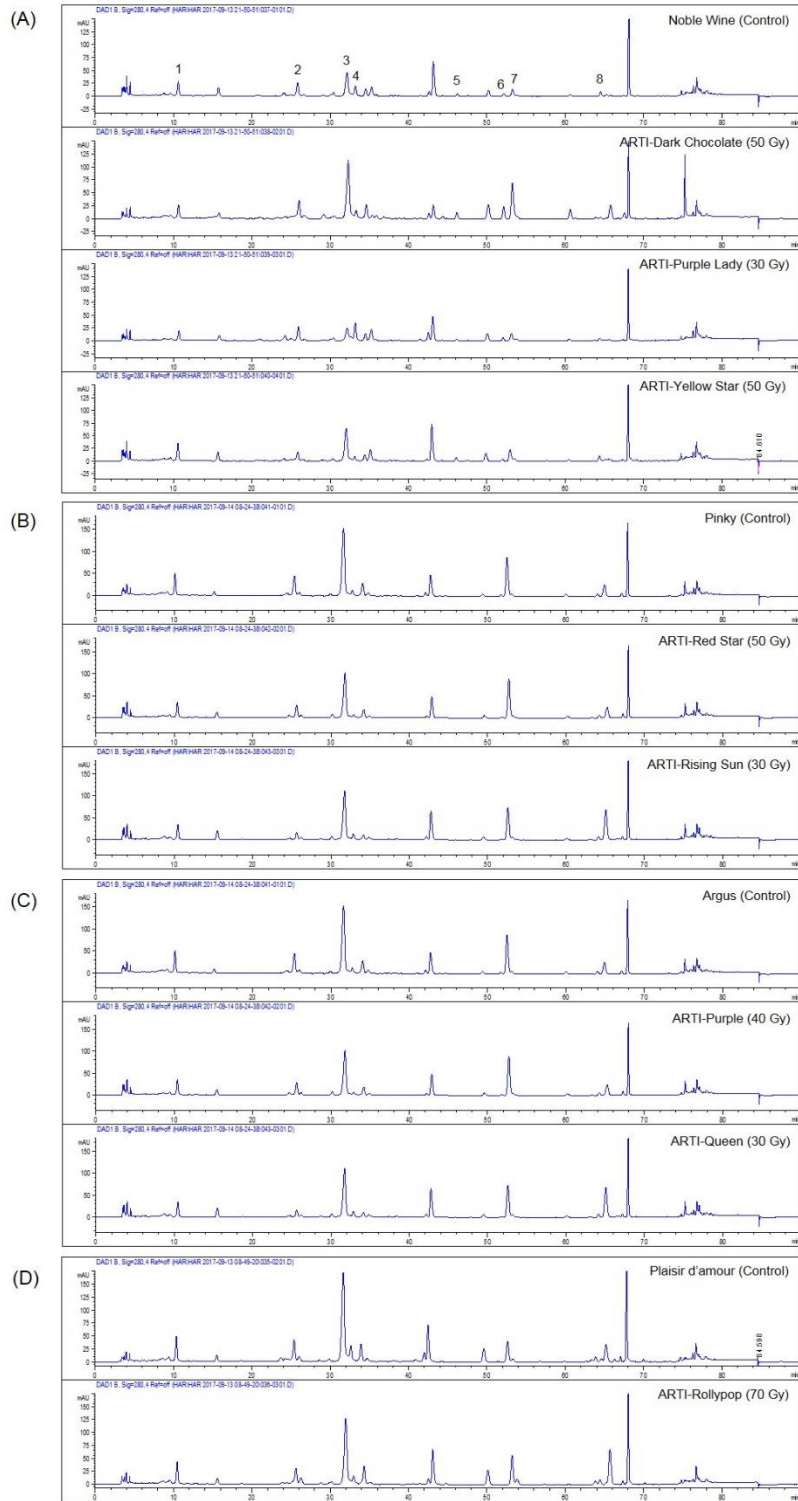

**Figure S1.** HPLC chromatograms of the flavonoid and phenolic acid profiles of *Chrysanthemum* cultivars detected at 280 nm. (A) The original cultivar 'Noble Wine' and its  $\gamma$ -irradiated mutant lines 'ARTI-Dark Chocolate' (50 Gy), 'ARTI-Dark Chocolate' (50 Gy), 'ARTI-Purple Lady' (30 Gy), and 'ARTI-Yellow Star' (50 Gy); (B) the original cultivar 'Pinky' and its  $\gamma$ -irradiated mutant lines 'ARTI-Red Star' (50 Gy) and 'ARTI-Rising Sun' (30 Gy); (C) the original cultivar 'Argus' and its  $\gamma$ -irradiated mutant lines 'ARTI-Purple' (40 Gy) and 'ARTI-Queen' (30 Gy); (D) the original cultivar 'Plaisir d'amour' and its  $\gamma$ -irradiated mutant line 'ARTI-Rollypop' (70 Gy). Peak identity: 1, chlorogenic acid; 2, luteolin-7-*O*- $\beta$ -glucoside; 3, 3,5-dicafeoylquinic acid; 4, apigenin-7-*O*- $\beta$ -glucoside; 5, linarin; 6, acacetin-7-*O*- $\beta$ -glucoside; 7, luteolin; 8, apigenin.

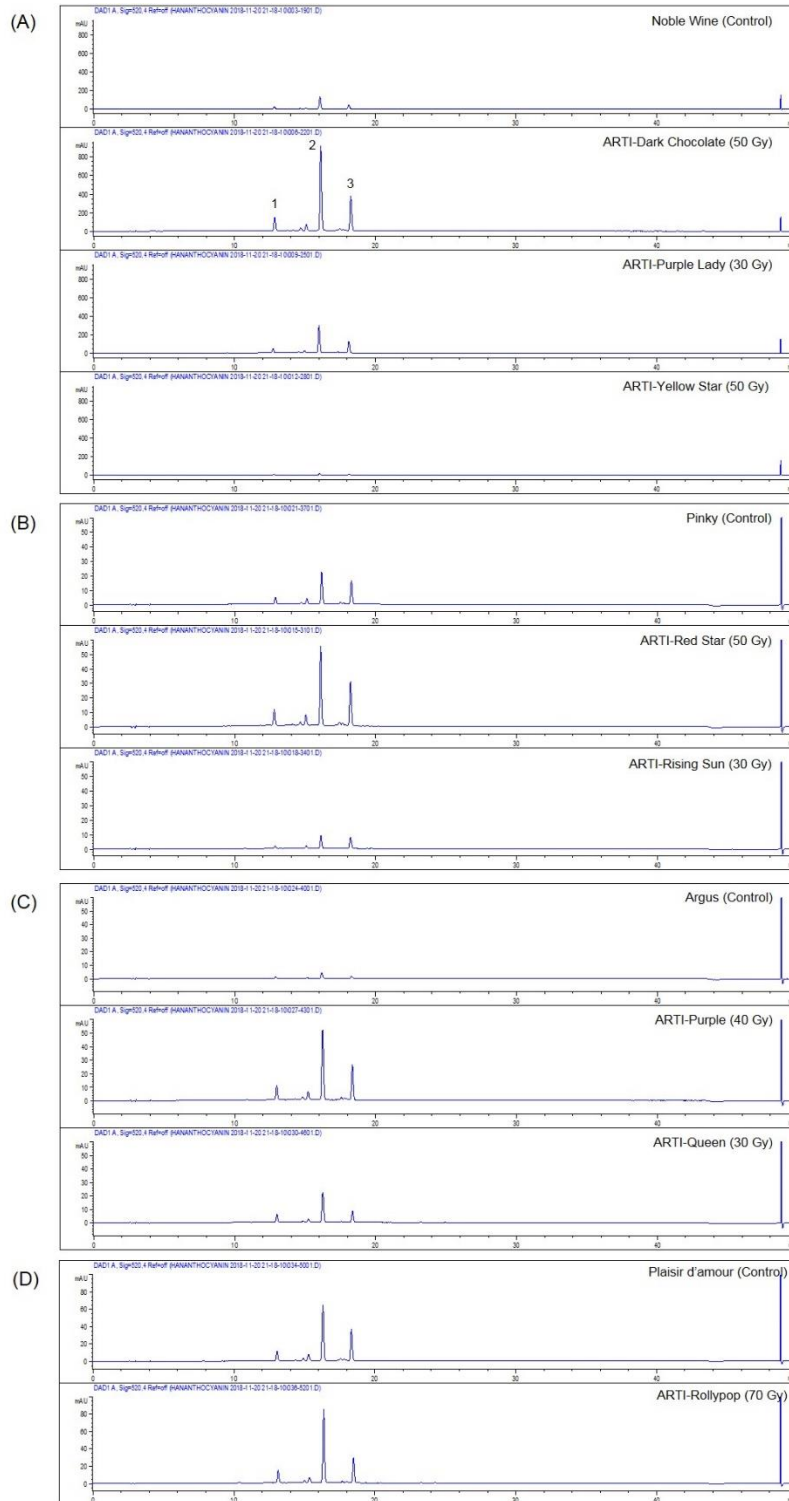

**Figure S2.** HPLC chromatograms of the anthocyanin profiles of *Chrysanthemum* cultivars detected at 520 nm. (A) The original cultivar 'Noble Wine' and its  $\gamma$ -irradiated mutant lines 'ARTI-Dark Chocolate' (50 Gy), 'ARTI-Dark Chocolate' (50 Gy), 'ARTI-Purple Lady' (30 Gy), and 'ARTI-Yellow Star' (50 Gy); (B) the original cultivar 'Pinky' and its  $\gamma$ -irradiated mutant lines 'ARTI-Red Star' (50 Gy) and 'ARTI-Rising Sun' (30 Gy); (C) the original cultivar 'Argus' and its  $\gamma$ -irradiated mutant lines 'ARTI-Purple' (40 Gy) and 'ARTI-Queen' (30 Gy); (D) the original cultivar 'Plaisir d'amour' and its  $\gamma$ -irradiated mutant line 'ARTI-Rollypop' (70 Gy). Peak identity: 1, cyanidin-3-*O*-glucoside; 2, cyanidin-3-*O*-(6''-malonylglucoside); 3, cyanidin.

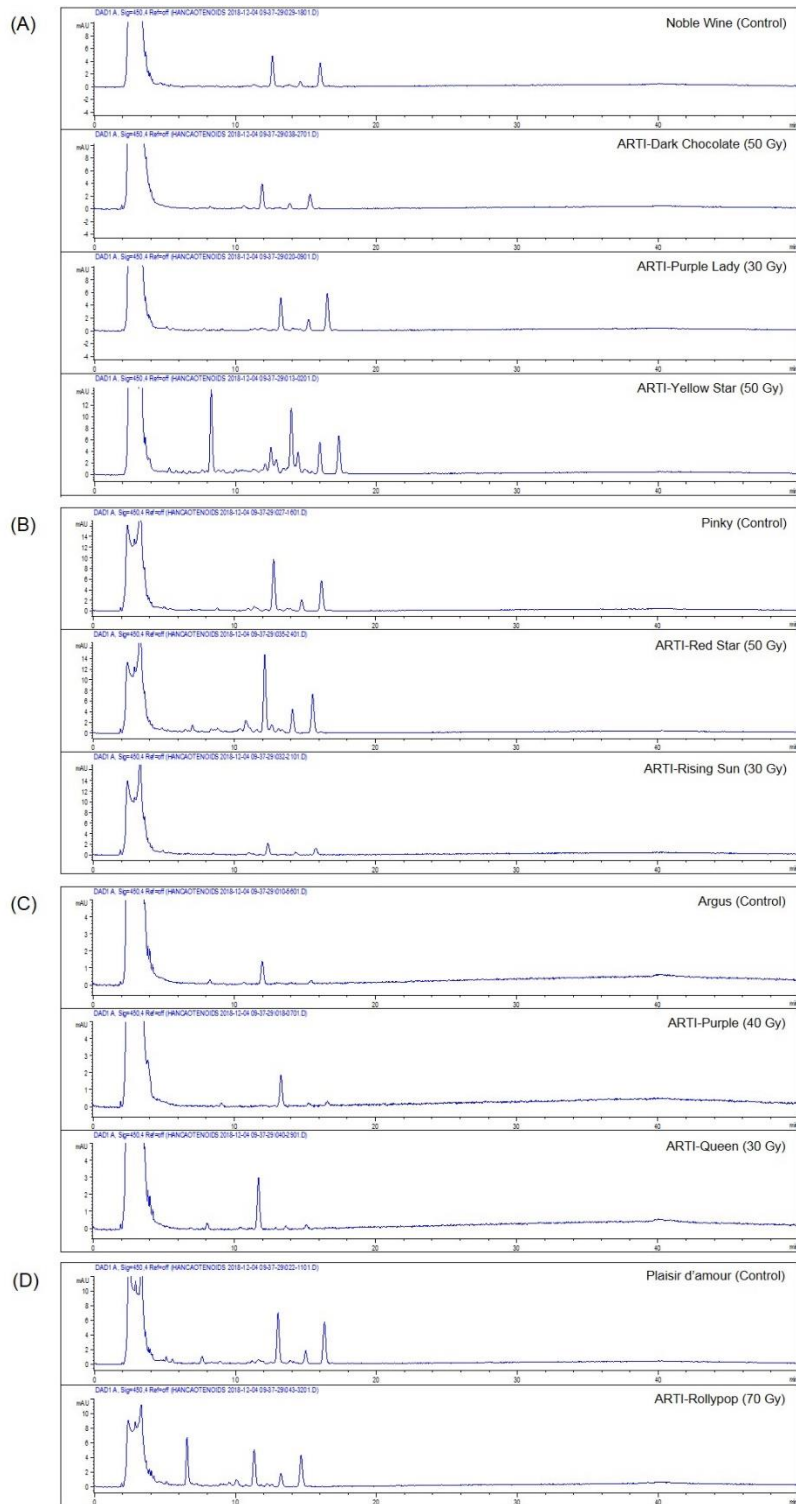

**Figure S3.** HPLC chromatograms of the cartenoid profiles of *Chrysanthemum* cultivars detected at 450 nm. (A) The original cultivar 'Noble Wine' and its  $\gamma$ -irradiated mutant lines 'ARTI-Dark Chocolate' (50 Gy), 'ARTI-Dark Chocolate' (50 Gy), 'ARTI-Purple Lady' (30 Gy), and 'ARTI-Yellow Star' (50 Gy); (B) the original cultivar 'Pinky' and its  $\gamma$ -irradiated mutant lines 'ARTI-Red Star' (50 Gy) and 'ARTI-Rising Sun' (30 Gy); (C) the original cultivar 'Argus' and its  $\gamma$ -irradiated mutant lines 'ARTI-Purple' (40 Gy) and 'ARTI-Queen' (30 Gy); (D) the original cultivar 'Plaisir d'amour' and its  $\gamma$ -irradiated mutant line 'ARTI-Rollypop' (70 Gy).

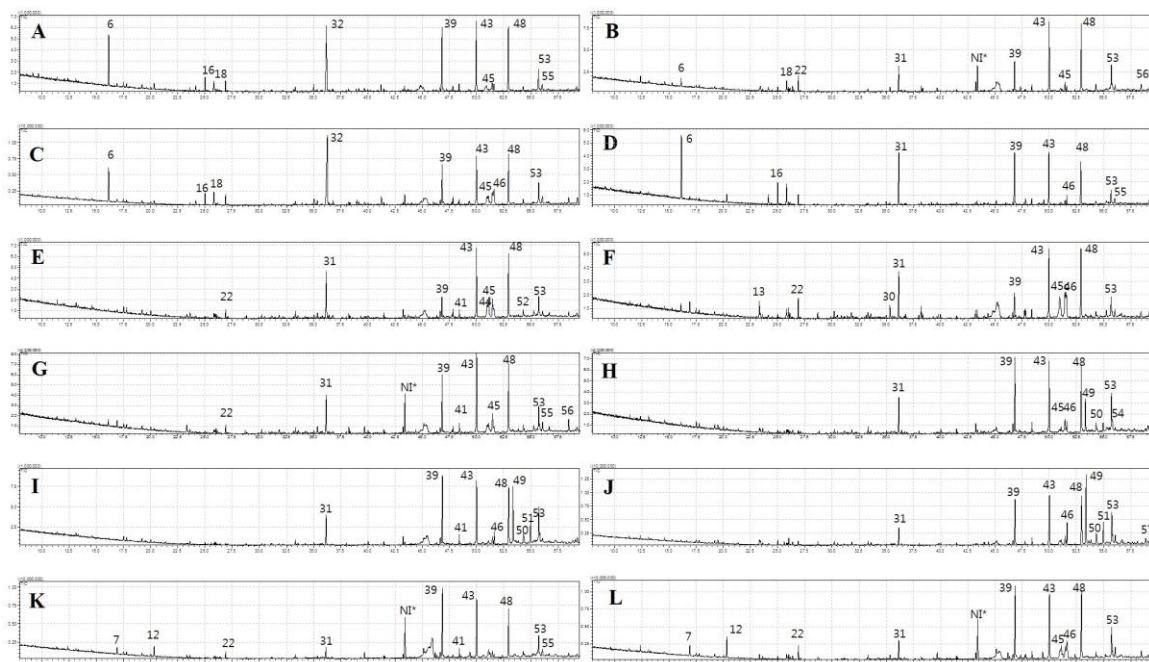

**Figure S4.** GC-MS chromatograms of the top ten constituents identified in volatile compounds of the *Chrysanthemum* cultivars. (A) 'Noble Wine' (control); (B) 'ARTI-Dark Chocolate' (50 Gy); (C) 'ARTI-Purple Lady' (30 Gy); (D) 'ARTI-Yellow Star' (50 Gy); (E) 'Pinky' (control); (F) 'ARTI-Red Star' (50 Gy); (G) 'ARTI-Rising Sun' (30 Gy); (H) 'Argus' (control); (I) 'ARTI-Purple' (40 Gy); (J) 'ARTI-Queen' (30 Gy); (K) 'Plaisir d'amour' (control); (L) 'ARTI-Lollipop' (70 Gy). Peak identity: 6, Camphor; 7, 1,7,7-Trimethylbicyclo[2.2.1]heptan-2-ol; 12, Bornyl acetate; 13, 1-Ethenyl-1-methyl-2,4-bis(1-methylethenyl)cyclohexane; 16, 7,11-Dimethyl-3-methylene-1,6,10-dodecatriene; 18, 1-Methyl-5-methylene-8-(1-methylethyl)-1,6-cyclodecadiene; 22, 3-(1,5-Dimethyl-4-hexenyl)-6-methylenecyclohexene; 30, 1-Phenyl-1-nonyne; 31,  $\alpha$ -2-Dimethyl-2-(4-methyl-3-pentenyl)-cyclopropanemethanol; 32, *trans*-3(10)-Caren-2-ol; 39, 2-Methyleicosane; 41, Heptacosane; 43, 2-Methyl-nonadecane; 45, 2-Methyltetracosane; 46, Squalene; 48, 7-Hexyleicosane; 49, Squalene oxide; 50, 11-Decyltetracosane; 51, 9-(3,3-Dimethyloxiran-2-yl)-2,7-dimethylnona-2,6-dien-1-ol; 53, 9-Octylheptadecane; 54, *Z*-12-Pentacosene; 55, *DL*- $\alpha$ -tocopherol; 56, 2,2,4-Trimethyl-3-(3,8,12,16-tetramethyl-heptadeca-3,7,11,15-tetraenyl)-cyclohexanol; 57, *cis*-2-Methyl-7-octadecene; NI, not identified.

**Table S1.** Volatile constituents in the flowers of the twelve chrysanthemum cultivars.

| No. | Retention time | Compound names                                             | Molecular Formula                              | Similarity (%) | Group I    |                     |                  |                  |       | Group II      |                 |       | Group III   |            |                 | Group VI      |      |    |      |    |      |    |      |    |      |    |      |    |
|-----|----------------|------------------------------------------------------------|------------------------------------------------|----------------|------------|---------------------|------------------|------------------|-------|---------------|-----------------|-------|-------------|------------|-----------------|---------------|------|----|------|----|------|----|------|----|------|----|------|----|
|     |                |                                                            |                                                |                | Noble Wine | ARTI-Dark Chocolate | ARTI-Purple Lady | ARTI-Yellow Star | Pinky | ARTI-Red Star | ARTI-Rising Sun | Argus | ARTI-Purple | ARTI-Queen | Plaisir d'amour | ARTI-Rollipop |      |    |      |    |      |    |      |    |      |    |      |    |
| 1   | 11.37          | 2,4-Dimethylhexane                                         | C <sub>8</sub> H <sub>18</sub>                 | 91             | 0.38       | bc                  | 0.16             | cd               | 0.28  | bc            | 0.00            | d     | 0.00        | d          | 0.00            | d             | 0.83 | a  | 0.22 | cd | 0.42 | b  | 0.00 | cd | 0.10 | cd |      |    |
| 2   | 11.40          | Decane                                                     | C <sub>10</sub> H <sub>22</sub>                | 93             | 0.00       | b                   | 0.15             | b                | 0.00  | b             | 0.00            | b     | 0.41        | a          | 0.00            | b             | 0.00 | b  | 0.51 | a  | 0.00 | b  | 0.00 | b  | 0.00 | b  |      |    |
| 3   | 12.38          | Eucalyptol                                                 | C <sub>10</sub> H <sub>18</sub> O              | 91             | 0.46       | b                   | 1.16             | a                | 0.00  | c             | 0.43            | b     | 0.00        | c          | 0.00            | c             | 0.39 | b  | 0.20 | c  | 0.60 | b  | 0.58 | b  | 1.09 | a  |      |    |
| 4   | 13.32          | 4-Methyl-1-undecene                                        | C <sub>12</sub> H <sub>24</sub>                | 90             | 0.00       | b                   | 0.15             | b                | 0.21  | b             | 0.00            | b     | 0.84        | a          | 0.00            | b             | 0.00 | b  | 0.18 | b  | 0.00 | b  | 0.00 | b  | 0.00 | b  |      |    |
| 5   | 15.30          | 2,6-Dimethyl-3,5-heptadien-2-ol                            | C <sub>9</sub> H <sub>16</sub> O               | 93             | 0.00       | c                   | 0.55             | a                | 0.00  | c             | 0.00            | c     | 0.00        | c          | 0.00            | c             | 0.00 | c  | 0.00 | c  | 0.41 | b  | 0.00 | c  | 0.00 | c  |      |    |
| 6   | 16.13          | Camphor                                                    | C <sub>10</sub> H <sub>16</sub> O              | 92             | 9.40       | a                   | 1.75             | b                | 7.17  | a             | 9.78            | a     | 0.00        | c          | 1.09            | b             | 1.15 | b  | 0.41 | c  | 0.00 | c  | 0.27 | c  | 0.00 | c  |      |    |
|     |                | 1,7,7-Trimethylbicyclo[2.2.1]heptan-2-ol                   | C <sub>10</sub> H <sub>16</sub> O              | 91             | 0.29       | c                   | 0.00             | d                | 0.39  | c             | 0.00            | d     | 0.00        | d          | 1.60            | b             | 1.50 | b  | 0.00 | d  | 0.00 | d  | 1.78 | b  | 2.10 | a  |      |    |
| 7   | 16.92          |                                                            |                                                |                |            |                     |                  |                  |       |               |                 |       |             |            |                 |               |      |    |      |    |      |    |      |    |      |    |      |    |
| 8   | 17.51          | Methyl salicylate                                          | C <sub>9</sub> H <sub>8</sub> O <sub>2</sub>   | 91             | 0.68       | cd                  | 0.48             | de               | 0.60  | cd            | 0.00            | f     | 1.42        | a          | 0.34            | e             | 0.76 | bc | 1.23 | a  | 0.95 | b  | 0.44 | de | 0.86 | bc | 0.56 | cd |
| 9   | 19.22          | 1,3-Bis(1,1-dimethylethyl)benzene                          | C <sub>14</sub> H <sub>22</sub>                | 90             | 0.50       | bc                  | 0.17             | cd               | 0.18  | cd            | 0.00            | d     | 1.17        | a          | 0.00            | d             | 0.60 | b  | 1.08 | a  | 0.45 | bc | 0.50 | bc | 0.62 | bc | 0.53 | bc |
|     |                | 2,6,6-Trimethylbicyclo[3.1.1]hept-2-en-4-ol acetate        | C <sub>12</sub> H <sub>20</sub> O <sub>2</sub> | 92             | 0.00       | b                   | 0.00             | b                | 0.00  | b             | 0.00            | b     | 0.00        | b          | 0.00            | b             | 0.90 | a  | 0.00 | b  | 0.83 | a  | 0.00 | b  | 0.00 | b  |      |    |
| 10  | 19.51          |                                                            |                                                |                |            |                     |                  |                  |       |               |                 |       |             |            |                 |               |      |    |      |    |      |    |      |    |      |    |      |    |
| 11  | 20.02          | 2,6-Methyldecane                                           | C <sub>12</sub> H <sub>26</sub>                | 90             | 0.15       | de                  | 0.17             | de               | 0.17  | de            | 0.00            | e     | 0.89        | a          | 0.00            | e             | 0.57 | bc | 0.82 | ab | 0.35 | cd | 0.20 | de | 0.71 | c  | 0.25 | de |
| 12  | 20.32          | Bornyl acetate                                             | C <sub>12</sub> H <sub>20</sub> O <sub>2</sub> | 91             | 0.49       | c                   | 0.00             | d                | 0.20  | d             | 0.85            | c     | 0.00        | d          | 0.00            | d             | 0.00 | d  | 0.00 | d  | 0.18 | d  | 0.00 | d  | 2.55 | b  | 4.07 | a  |
| 13  | 23.33          | 1-Ethyl-1-methyl-2,4-bis(1-methylethenyl)cyclohexane       | C <sub>15</sub> H <sub>34</sub>                | 92             | 0.42       | d                   | 0.00             | f                | 0.28  | ef            | 0.00            | f     | 0.51        | de         | 2.78            | a             | 1.11 | b  | 0.62 | cd | 0.00 | f  | 0.91 | bc | 0.83 | cd | 0.74 | cd |
| 14  | 23.62          | 4,8-Dimethyltridecane                                      | C <sub>15</sub> H <sub>32</sub>                | 90             | 0.43       | d                   | 0.21             | e                | 0.28  | de            | 0.00            | f     | 1.01        | a          | 0.00            | f             | 0.60 | c  | 0.81 | b  | 0.61 | c  | 0.30 | de | 0.51 | d  | 0.39 | d  |
| 15  | 24.17          | cis-α-Bisabolene                                           | C <sub>15</sub> H <sub>24</sub>                | 90             | 1.00       | a                   | 0.65             | ab               | 1.06  | a             | 1.27            | a     | 0.00        | b          | 0.00            | b             | 0.00 | b  | 0.00 | b  | 0.00 | b  | 0.00 | b  | 0.00 | b  | 0.00 | b  |
| 16  | 25.02          | 7,11-Dimethyl-3-methylene-1,6,10-dodecatriene              | C <sub>15</sub> H <sub>24</sub>                | 93             | 1.99       | a                   | 0.76             | b                | 1.91  | a             | 2.37            | a     | 0.00        | b          | 0.21            | b             | 0.00 | b  | 0.00 | b  | 0.24 | b  | 0.81 | b  | 0.00 | b  | 0.34 | b  |
| 17  | 25.60          | Caryophyllene                                              | C <sub>15</sub> H <sub>24</sub>                | 92             | 0.00       | c                   | 0.00             | c                | 0.00  | c             | 0.00            | c     | 0.00        | c          | 0.00            | c             | 0.00 | c  | 0.00 | c  | 0.33 | b  | 0.69 | a  | 0.00 | c  | 0.00 | c  |
| 18  | 25.82          | 1-Methyl-5-methylene-8-(1-methylethyl)-1,6-cyclodecadiene  | C <sub>15</sub> H <sub>24</sub>                | 90             | 1.96       | ab                  | 2.43             | ab               | 2.48  | a             | 2.51            | a     | 1.02        | cd         | 1.35            | bc            | 0.00 | e  | 0.68 | de | 0.00 | e  | 0.28 | de | 0.00 | e  | 0.78 | de |
| 19  | 25.93          | 2,3,6,7-Tetramethyl-octane                                 | C <sub>12</sub> H <sub>26</sub>                | 90             | 0.28       | c                   | 0.31             | c                | 0.00  | d             | 0.00            | d     | 0.94        | a          | 0.00            | d             | 0.00 | d  | 0.84 | ab | 0.46 | bc | 0.23 | c  | 1.10 | ab | 0.37 | c  |
| 20  | 26.02          | (Z,Z)-α-Farnesene                                          | C <sub>15</sub> H <sub>24</sub>                | 90             | 0.00       | e                   | 0.84             | c                | 0.27  | d             | 0.28            | d     | 0.73        | c          | 1.47            | a             | 0.85 | c  | 0.26 | d  | 0.35 | d  | 1.23 | b  | 0.00 | e  | 0.63 | c  |
| 21  | 26.38          | α-Farnesene                                                | C <sub>15</sub> H <sub>24</sub>                | 91             | 0.00       | d                   | 0.93             | a                | 0.00  | d             | 0.00            | d     | 0.00        | d          | 0.00            | d             | 0.00 | d  | 0.00 | d  | 0.00 | d  | 0.59 | b  | 0.00 | d  | 0.42 | c  |
| 22  | 26.91          | 3-(1,5-Dimethyl-4-hexenyl)-6-methylenecyclohexene          | C <sub>15</sub> H <sub>24</sub>                | 90             | 1.52       | de                  | 2.90             | ab               | 1.71  | cd            | 1.07            | de    | 1.93        | c          | 3.06            | a             | 1.55 | de | 0.63 | f  | 0.00 | g  | 0.88 | ef | 1.65 | de | 2.23 | bc |
| 23  | 28.70          | trans-3,6-Diethyl-3,6-dimethyltricyclo[3.1.0.0(2,4)]hexane | C <sub>17</sub> H <sub>30</sub>                | 91             | 0.00       | e                   | 0.34             | d                | 0.00  | e             | 0.00            | e     | 0.00        | e          | 0.72            | a             | 0.49 | c  | 0.00 | e  | 0.00 | e  | 0.62 | b  | 0.00 | e  | 0.36 | d  |
| 24  | 30.22          | Octahydro-1,4,9,9-tetramethyl-1H-3a,7-methanoazulene       | C <sub>15</sub> H <sub>26</sub>                | 90             | 0.00       | d                   | 0.00             | d                | 0.00  | d             | 0.00            | d     | 0.76        | c          | 1.28            | a             | 0.78 | bc | 0.70 | d  | 0.00 | d  | 0.83 | b  | 0.00 | d  | 0.00 | d  |
| 25  | 33.25          | 9,12-Octadecadienyl chloride                               | C <sub>18</sub> H <sub>31</sub> ClO            | 91             | 0.39       | a                   | 0.00             | b                | 0.00  | b             | 0.34            | a     | 0.00        | b          | 0.00            | b             | 0.00 | b  | 0.00 | b  | 0.00 | b  | 0.00 | b  | 0.00 | b  | 0.00 | b  |
| 26  | 33.33          | 1-Octadecene                                               | C <sub>18</sub> H <sub>36</sub>                | 92             | 0.79       | cd                  | 0.54             | de               | 0.54  | de            | 0.30            | e     | 1.32        | a          | 0.96            | bc            | 1.17 | ab | 1.15 | ab | 0.74 | cd | 0.66 | d  | 0.78 | cd | 0.51 | de |
| 27  | 33.48          | 2,6,11-Trimethyldecane                                     | C <sub>13</sub> H <sub>28</sub>                | 90             | 0.00       | b                   | 0.00             | b                | 0.00  | b             | 0.00            | b     | 0.28        | a          | 0.00            | b             | 0.00 | b  | 0.00 | b  | 0.00 | b  | 0.00 | b  | 0.00 | b  | 0.00 | b  |
| 28  | 34.24          | Cyclopentadecanol                                          | C <sub>15</sub> H <sub>32</sub> O              | 92             | 0.00       | b                   | 0.00             | b                | 0.00  | b             | 0.28            | a     | 0.00        | b          | 0.00            | b             | 0.00 | b  | 0.00 | b  | 0.00 | b  | 0.00 | b  | 0.00 | b  | 0.00 | b  |
| 29  | 35.00          | α-Bisabolol                                                | C <sub>15</sub> H <sub>26</sub> O              | 90             | 1.22       | a                   | 0.00             | c                | 1.24  | a             | 0.73            | b     | 0.92        | b          | 0.00            | c             | 0.00 | c  | 0.00 | c  | 0.20 | c  | 0.00 | c  | 0.00 | c  | 0.00 | c  |
| 30  | 35.34          | 1-Phenyl-1-nonyne                                          | C <sub>15</sub> H <sub>20</sub>                | 91             | 0.19       | d                   | 0.88             | b                | 0.56  | c             | 0.00            | d     | 0.90        | b          | 2.03            | a             | 0.86 | a  | 0.00 | d  | 0.00 | d  | 0.00 | d  | 0.00 | d  | 0.00 | d  |
| 31  | 36.19          | α-2-Dimethyl-2-(4-methyl-3-pentenyl)-cyclopropanemethanol  | C <sub>12</sub> H <sub>22</sub> O              | 90             | 0.00       | ab                  | 6.36             | bc               | 0.00  | f             | 13.2            | a     | 12.9        | bc         | 10.2            | ab            | 8.24 | ab | 7.05 | ab | 7.20 | ab | 3.77 | cd | 2.74 | e  | 3.32 | cd |
| 32  | 36.24          | trans-3(10)-Caren-2-ol                                     | C <sub>10</sub> H <sub>16</sub> O              | 92             | 18.0       | b                   | 0.00             | c                | 22.7  | a             | 0.00            | c     | 0.00        | c          | 0.00            | c             | 0.00 | c  | 0.00 | c  | 0.00 | c  | 0.00 | c  | 0.00 | c  | 0.00 | c  |
| 33  | 39.69          | Octadecane                                                 | C <sub>18</sub> H <sub>38</sub>                | 90             | 0.00       | e                   | 0.72             | c                | 0.26  | d             | 0.00            | e     | 0.00        | e          | 0.00            | e             | 1.07 | a  | 0.00 | e  | 0.00 | e  | 0.00 | e  | 1.31 | a  | 0.88 | b  |
| 34  | 39.81          | 2,6-Dimethyl-1,7-octadien-3-ol                             | C <sub>10</sub> H <sub>18</sub> O              | 92             | 0.00       | b                   | 0.00             | b                | 0.00  | b             | 0.00            | b     | 0.54        | a          | 0.00            | b             | 0.00 | b  | 0.00 | b  | 0.00 | b  | 0.00 | b  | 0.00 | b  | 0.00 | b  |
| 35  | 41.46          | Cycloicosane                                               | C <sub>20</sub> H <sub>40</sub>                | 90             | 0.21       | d                   | 0.37             | cd               | 0.18  | d             | 0.00            | e     | 0.90        | a          | 0.23            | de            | 0.49 | bc | 0.66 | b  | 0.62 | bc | 0.41 | cd | 0.58 | bc | 0.19 | d  |
| 36  | 41.56          | 2,3,3-Trimethyl-octane                                     | C <sub>11</sub> H <sub>24</sub>                | 91             | 0.00       | b                   | 0.00             | b                | 0.00  | b             | 0.00            | b     | 0.00        | b          | 0.00            | b             | 0.00 | b  | 0.00 | b  | 0.00 | b  | 0.00 | b  | 0.00 | a  | 0.13 | a  |
| 37  | 43.38          | 2-Methyleicosane                                           | C <sub>21</sub> H <sub>44</sub>                | 95             | 0.00       | b                   | 0.00             | b                | 0.00  | b             | 0.00            | b     | 0.00        | b          | 0.41            | a             | 0.00 | b  | 0.00 | b  | 0.00 | b  | 0.59 | a  | 0.00 | b  | 0.00 | b  |
| 38  | 46.19          | 2-Methyltricosane                                          | C <sub>24</sub> H <sub>50</sub>                | 93             | 0.00       | c                   | 0.00             | c                | 0.00  | c             | 0.00            | c     | 0.00        | c          | 0.00            | c             | 0.00 | c  | 0.00 | c  | 0.00 | c  | 0.00 | c  | 0.87 | a  | 0.82 | b  |
| 39  | 46.80          | 2-Methyleicosane                                           | C <sub>21</sub> H <sub>44</sub>                | 96             | 12.4       | c                   | 6.53             | e                | 7.24  | e             | 14.6            | b     | 4.32        | f          | 4.30            | f             | 10.4 | d  | 14.6 | b  | 15.4 | b  | 10.2 | d  | 22.3 | a  | 15.2 | b  |
| 40  | 47.24          | Diisooctyl phthalate                                       | C <sub>24</sub> H <sub>38</sub> O <sub>4</sub> | 90             | 0.30       | a                   | 0.00             | b                | 0.00  | b             | 0.00            | b     | 0.00        | b          | 0.00            | b             | 0.00 | b  | 0.00 | b  | 0.00 | b  | 0.00 | b  | 0.00 | b  | 0.00 | b  |
| 41  | 48.41          | Heptacosane                                                | C <sub>27</sub> H <sub>56</sub>                | 91             | 0.72       | bc                  | 1.34             | bc               | 0.50  | c             | 0.99            | bc    | 1.58        | bc         | 0.67            | c             | 1.67 | bc | 0.88 | bc | 1.74 | a  | 1.24 | bc | 2.06 | a  | 1.12 | bc |
| 42  | 49.38          | 2,21-Dimethyltricosane                                     | C <sub>24</sub> H <sub>50</sub>                | 90             | 0.63       | ab                  | 0.32             | b                | 0.62  | b             | 0.75            | ab    | 0.00        | c          | 0.67            | ab            | 0.00 | c  | 0.87 | ab | 0.18 | b  | 1.10 | a  | 1.10 | a  | 0.91 | ab |
| 43  | 50.00          | 2-Methylnonadecane                                         | C <sub>20</sub> H <sub>42</sub>                | 95             | 13.5       | cd                  | 17.7             | a                | 10.3  | e             | 15.6            | ab    | 17.1        | a          | 13.7            | cd            | 16.5 | ab | 14.3 | b  | 14.8 | bc | 11.5 | d  | 17.6 | ab | 13.0 | cd |
| 44  | 51.10          | 9-Octadecenamide                                           | C <sub>18</sub> H <sub>33</sub> NO             | 91             | 0.00       | c                   | 0.35             | c                | 1.36  | b             | 0.00            | c     | 4.26        | a          | 0.00            | c             | 1.48 | b  | 0.78 | b  | 0.00 | c  | 0.68 | b  | 0.00 | b  | 1.43 | b  |

|       |       |                                                                                      |                                                |    |       |    |      |    |      |    |       |    |       |    |       |    |       |    |       |    |       |    |       |    |       |    |       |    |
|-------|-------|--------------------------------------------------------------------------------------|------------------------------------------------|----|-------|----|------|----|------|----|-------|----|-------|----|-------|----|-------|----|-------|----|-------|----|-------|----|-------|----|-------|----|
| 45    | 51.45 | 2-Methyltetracosane                                                                  | C <sub>25</sub> H <sub>52</sub>                | 90 | 1.77  | d  | 2.16 | cd | 3.17 | cd | 1.47  | d  | 6.91  | a  | 5.14  | b  | 3.61  | bc | 2.59  | cd | 1.38  | d  | 1.47  | d  | 1.45  | d  | 5.05  | b  |
| 46    | 51.61 | Squalene                                                                             | C <sub>30</sub> H <sub>50</sub>                | 91 | 1.34  | cd | 1.28 | cd | 2.64 | bc | 1.59  | cd | 0.00  | e  | 5.60  | a  | 0.78  | d  | 1.61  | cd | 2.15  | bc | 3.82  | ab | 0.50  | d  | 3.83  | ab |
| 47    | 52.37 | 2,21-Dimethyldocosane                                                                | C <sub>24</sub> H <sub>50</sub>                | 90 | 0.00  | d  | 0.00 | d  | 0.00 | d  | 0.14  | c  | 0.00  | d  | 0.00  | d  | 0.00  | d  | 0.00  | d  | 0.00  | d  | 0.00  | d  | 0.48  | b  | 0.62  | a  |
| 48    | 52.94 | 7-Hexyleicosane                                                                      | C <sub>28</sub> H <sub>54</sub>                | 95 | 12.5  | de | 20.2 | a  | 10.9 | de | 15.4  | de | 16.8  | b  | 14.2  | cd | 14.4  | cd | 15.1  | bc | 14.1  | cd | 12.4  | de | 14.5  | cd | 13.0  | cd |
|       |       |                                                                                      |                                                |    | 0     |    | 3    |    | 2    |    | 2     |    | 6     |    | 1     |    | 0     |    | 0     |    | 0     |    | 9     |    | 4     |    | 7     |    |
| 49    | 53.34 | Squalene oxide                                                                       | C <sub>30</sub> H <sub>50</sub>                | 91 | 0.00  | d  | 0.00 | d  | 0.00 | d  | 0.00  | d  | 0.00  | d  | 0.00  | d  | 0.00  | d  | 6.31  | c  | 12.2  | b  | 15.3  | a  | 0.00  | d  | 0.00  | d  |
|       |       |                                                                                      |                                                |    |       |    |      |    |      |    |       |    |       |    |       |    |       |    | 9     |    | 8     |    |       |    |       |    |       |    |
| 50    | 54.96 | 11-decyltetracosane                                                                  | C <sub>34</sub> H <sub>70</sub>                | 92 | 0.82  | de | 1.37 | bc | 0.78 | ef | 0.93  | de | 1.13  | cd | 0.98  | de | 1.18  | cd | 1.56  | b  | 2.32  | a  | 2.03  | a  | 0.64  | ef | 0.71  | ef |
| 51    | 54.96 | 9-(3,3-Dimethyloxiran-2-yl)-2,7-dimethylnona-2,6-dien-1-ol                           | C <sub>15</sub> H <sub>26</sub> O <sub>2</sub> | 90 | 0.00  | c  | 0.00 | c  | 0.00 | c  | 0.00  | c  | 0.00  | c  | 0.00  | c  | 0.00  | c  | 1.48  | b  | 4.31  | a  | 4.23  | a  | 0.00  | c  | 0.00  | c  |
| 52    | 55.27 | 6-methyltridecane                                                                    | C <sub>14</sub> H <sub>30</sub>                | 92 | 0.00  | d  | 0.00 | d  | 0.00 | d  | 0.00  | d  | 1.48  | a  | 0.95  | b  | 0.95  | b  | 0.00  | d  | 0.00  | d  | 0.00  | d  | 0.00  | d  | 0.47  | c  |
| 53    | 55.71 | 9-octylheptadecane                                                                   | C <sub>23</sub> H <sub>46</sub>                | 94 | 4.65  | d  | 6.66 | b  | 4.50 | d  | 5.83  | bc | 4.91  | cd | 3.83  | d  | 4.36  | d  | 8.66  | a  | 8.28  | a  | 7.76  | a  | 4.22  | cd | 5.96  | bc |
| 54    | 55.80 | Z-12-Pentacosene                                                                     | C <sub>25</sub> H <sub>50</sub>                | 90 | 0.00  | c  | 1.37 | a  | 0.00 | c  | 0.00  | c  | 0.00  | c  | 0.60  | bc | 0.56  | bc | 1.72  | a  | 1.61  | a  | 0.72  | b  | 0.00  | c  | 0.39  | bc |
| 55    | 56.56 | D <sub>3</sub> -α-tocopherol                                                         | C <sub>29</sub> H <sub>50</sub> O <sub>2</sub> | 90 | 1.65  | b  | 1.48 | b  | 1.88 | ab | 2.57  | a  | 0.73  | cd | 1.19  | bc | 1.71  | b  | 0.00  | e  | 0.48  | de | 1.67  | b  | 2.00  | ab | 1.94  | ab |
| 56    | 58.48 | 2,2,4-Trimethyl-3-(3,8,12,16-tetramethyl-heptadeca-3,7,11,15-tetraenyl)-cyclohexanol | C <sub>34</sub> H <sub>58</sub> O              | 91 | 0.00  | d  | 2.32 | a  | 1.34 | b  | 0.00  | d  | 0.57  | c  | 1.39  | b  | 2.71  | a  | 0.00  | d  | 0.00  | d  | 0.00  | d  | 0.60  | c  | 1.24  | b  |
| 57    | 59.23 | cis-2-Methyl-7-octadecene                                                            | C <sub>19</sub> H <sub>38</sub>                | 92 | 0.51  | b  | 0.62 | b  | 1.54 | ab | 1.10  | ab | 0.63  | b  | 0.79  | ab | 0.00  | c  | 1.13  | ab | 0.00  | c  | 1.68  | a  | 0.00  | c  | 0.65  | b  |
| Total |       |                                                                                      |                                                |    | 91.55 |    | 86.8 |    | 89.6 |    | 94.48 |    | 89.42 |    | 82.32 |    | 82.23 |    | 90.81 |    | 92.93 |    | 91.61 |    | 85.02 |    | 87.07 |    |

<sup>1</sup> Mean separation within columns by Ducan's Multiple Range Tests ( $p \leq 0.05$ )
